# Supplementary material
Source: publisher figshare collection journal article supplement (https://karger.figshare.com/ndownloader/files/14465282)
Supplement: Supplementary file 1 [file 14465282]

Online Supplemental Materials for

Genetic knowledge within a national Australian sample: Comparisons with  
other diverse populations

Ilan Dar-Nimrod<sup>1,2</sup>, Georgia MacNevin<sup>1</sup>, Alexandra Godwin<sup>1</sup>, Kate Lynch<sup>2,3</sup>,  
Tali Magory Cohen<sup>4</sup>, Asha Ganesan<sup>1</sup>, and James Morandini<sup>1</sup>

<sup>1</sup> School of Psychology, University of Sydney, <sup>2</sup> The Charles Perkins Centre,  
University of Sydney, <sup>3</sup> Macquarie University, <sup>4</sup> Tel Aviv University

Please address correspondence to:

Ilan Dar-Nimrod

School of Psychology | Faculty of Science  
Rm No, 420 Brennan MacCallum Building, A18

The University of Sydney | NSW | 2006 | Australia

T [+61 2 9351 2908](tel:+61293512908) | F [+61 2 9036 5223](tel:+61290365223) | [ilan.dar-nimrod@sydney.edu.au](mailto:ilan.dar-nimrod@sydney.edu.au)

## **Method** (Additional information)

### **Remoteness evaluations:**

In line with the Australian Bureau of Statistics (ABS, 2005), postcodes were coded based on the Accessibility/Remoteness Index of Australia (ARIA) developed by the Commonwealth Department of Health and Aged Care (DHAC) and the National Key Centre for Social Applications of GIS (GISCA). Scores ranged from 0-15 with lower scores indicating major cities and higher scores indicating increasing remoteness. For descriptive purposes and in line with the ABS (2005), these scores were summarised into the following Remoteness Areas (RAs): major cities, inner regional, outer regional, remote, and very remote.

### **Genetic knowledge and affinity:**

Overall exposure to genetic information was calculated by averaging two items that assessed the level of study and work in the area of genetics. That is, “Does your work (not study) involve genetics and inheritance?” and “Have you studied genetics and inheritance before (as a school/university subject, or part of a more general course)?” The two items were moderately and positively correlated ( $r = .38$ ,  $p < .001$ ). Lower scores indicated more exposure to genetics. For example, the profession item offered the following options: 1 = Yes, my work mostly focuses on genetics and inheritance (e.g., geneticist, genetic counsellor); 2 = Yes, my work involves genetics and inheritance, but it is not the main focus (e.g., doctor, science teacher); and 3 = No, I do not do work involving genetics and inheritance. Averaged scores ranged from 1-3 with lower scores indicating greater exposure to genetic information.

Genetic affinity was calculated by averaging two items ( $r = .39$ ,  $p < .001$ ) that assessed level of interest in and perceived understanding of genetic information. That is

“How well do you feel like you understand genetics and inheritance?” and “How interested are you in genetics and inheritance?” Lower scores on each item indicated greater genetic affinity. For example, 1 = Very Well, 2 = Quite well, 3 = Not very well, and 4 = Not at all. Averaged scores ranged from 1-4 with the lower scores indicating greater genetic affinity.

### **Detailed demographics:**

For ethnicity, Middle Eastern (10 responses), Aboriginal/Torres Strait Islander (5 responses), Pacific Islander (4 responses), and Multi-ethnic (17 responses), and other (35 responses) were collapsed into the category of other. For State/Territory, the Australian Capital Territory (ACT; 15 responses), Northern Territory (NT; 1 responses) and Tasmania (17 responses), were collapsed into the category of other. For religious background, Buddhism (14 responses), Hinduism (13 responses), Islam (13 responses), Judaism (6 responses), and other (30 responses) were collapsed into the category of other. As the current sample had very few respondents that indicated a high level of exposure to genetics (12 responses) or medium level of exposure to genetics (18 responses), these were collapsed into a single category. The majority of the sample resided in New South Wales and in major cities. The demographic information about the samples of the comparison studies appears in Table S1.

Table S1. *Details of the demographic characteristics of the respondents from previous studies.*

| Study                                                | Christensen et al.<br>2009 | Jallinoja & Aro<br>1999 | Molster et al.<br>2009        | Ashida et al.<br>2011            |
|------------------------------------------------------|----------------------------|-------------------------|-------------------------------|----------------------------------|
| Sample size                                          | 1,200                      | 1,216                   | 1,009                         | 971                              |
| Country                                              | USA                        | Finland                 | Western<br>Australia          | USA                              |
| Age                                                  | 18-90                      | 16-65                   | 18+                           | 18+                              |
| Ethnicity                                            | Black, White               | -                       | -                             | Black, White,<br>Hispanic, other |
| Education                                            | 7 levels                   | 4 levels                | 5 levels                      | 3 levels                         |
| Household<br>income/<br>socio-<br>economic<br>status | 4 levels                   | 6 levels                | 4 levels                      | -                                |
| Occupation                                           | -                          | health profession       | -                             | -                                |
| Marital<br>status                                    | -                          | 3 levels                | -                             | -                                |
| Employment<br>status                                 | -                          | yes/no                  | -                             | -                                |
| Geographic<br>location                               | -                          | -                       | Metropolitan,<br>Rural/remote | -                                |
| Health<br>status                                     | -                          | -                       | -                             | 2 levels                         |
| Place of<br>birth                                    | -                          | -                       | -                             | born in the<br>USA               |
| Religious<br>affiliation                             | -                          | -                       | -                             | -                                |
| Political<br>affiliation                             | -                          | -                       | -                             | -                                |
| Parental<br>status                                   | -                          | -                       | -                             | -                                |

## **Results (additional information)**

### **Item by item comparisons of genetic knowledge:**

For a description of the number of correct responses to the individual genetic knowledge items in the current paper and the source papers, see Table S2. Across the 30 items, the percentage of correct answers in the current sample ranged from 19% to 98%. On average, participants performed better than chance on all items with the exception of the two items regarding genetics and race.

On the item level, chi-squared tests of independence were conducted to test for differences in the percentage of correct responses between the current paper and the source papers. Some items appeared in more than one source paper leading to 36 comparisons. The criterion for significance was adjusted to account for the number of statistical tests simultaneously performed on the data. Bonferroni adjusted p-values were calculated such that the critical p-value ( $\alpha = .05$ ) was divided by the number of comparisons (36) to attain adjusted p-value of .0013. Of these comparisons, 26 were significant, in each, the current sample had a greater percentage of correct responses ( $p$ 's < .001).

Table S2. Number and percentage of respondents correctly answering genetic knowledge. Questions

| Question<br>(subcategory or genetic knowledge)                                        | Answer         | Correct<br>respondents in<br>the current<br>study<br>n (%) | Source Paper                                        | Correct<br>Respondents<br>from previous<br>studies<br>% | Between papers test<br>of frequency of<br>correct responses                |
|---------------------------------------------------------------------------------------|----------------|------------------------------------------------------------|-----------------------------------------------------|---------------------------------------------------------|----------------------------------------------------------------------------|
| 1. The onset of certain diseases is due to genes, environment and lifestyle (disease) | Correct        | 648 (90%)                                                  | Jallinoja and Aro (1999)                            | 1070 (88%)                                              | $\chi^2(1, N = 1936) = 1.82, p = .18$                                      |
| 2. A gene is a disease (disease)                                                      | Not<br>Correct | 698 (97%)                                                  | Jallinoja and Aro (1999)                            | 1058 (87%)                                              | $\chi^2(1, N = 1936) = 53.0^{**}$                                          |
| 3. One can see a gene with the naked eye (physiology/biology)                         | Not<br>Correct | 706 (98%)                                                  | Jallinoja and Aro (1999)                            | 1058 (87%)                                              | $\chi^2(1, N = 1936) = 68.2^{**}$                                          |
| 4. Healthy parents can have a child with a hereditary disease (disease, family)       | Correct        | 691 (96%)                                                  | Jallinoja and Aro (1999);<br>Molster et al. (2009)* | 1034 (85%)<br><br>918 (91%)                             | $\chi^2(1, N = 1936) = 55.7^{**}$<br><br>$\chi^2(1, N = 1729) = 16.2^{**}$ |

| Question<br><br>(subcategory or genetic knowledge)                                                         | Answer             | Correct<br><br>respondents in<br>the current<br>study<br><br>n (%) | Source Paper                                           | Correct<br><br>Respondents<br>from previous<br>studies<br><br>% | Between papers test<br><br>of frequency of<br>correct responses              |
|------------------------------------------------------------------------------------------------------------|--------------------|--------------------------------------------------------------------|--------------------------------------------------------|-----------------------------------------------------------------|------------------------------------------------------------------------------|
| 5. The carrier of a disease gene may be completely healthy (disease)                                       | Correct            | 677 (94%)                                                          | Jallinoja and Aro (1999);<br><br>Molster et al. (2009) | 1009 (83%)<br><br>868 (86%)                                     | $\chi^2(1, N = 1936) = 49.1^{**}$<br><br>$\chi^2(1, N = 1729) = 28.3^{**}$   |
| 6. All serious diseases are hereditary (disease, family)                                                   | Not<br><br>Correct | 670 (93%)                                                          | Jallinoja and Aro (1999)                               | 1009 (83%)                                                      | $\chi^2(1, N = 1936) = 39.9^{**}$                                            |
| 7. The child of a disease gene carrier is always also a carrier of the same disease gene (disease, family) | Not<br><br>Correct | 540 (75%)                                                          | Jallinoja and Aro (1999)                               | 730 (60%)                                                       | $\chi^2(1, N = 1936) = 44.9^{**}$                                            |
| 8. A gene is a piece of DNA (physiology/biology)                                                           | Correct            | 626 (87%)                                                          | Jallinoja and Aro (1999);<br><br>Molster et al. (2009) | 693 (57%)<br><br>605 (60%)                                      | $\chi^2(1, N = 1936) = 186.9^{**}$<br><br>$\chi^2(1, N = 1729) = 149.2^{**}$ |
| 9. Genes are inside cells (physiology/biology)                                                             | Correct            | 576 (80%)                                                          | Jallinoja and Aro (1999)                               | 669 (55%)                                                       | $\chi^2(1, N = 1936) = 123.0^{**}$                                           |

| Question<br><br>(subcategory or genetic knowledge)                                                        | Answer             | Correct<br><br>respondents in<br>the current<br>study<br><br>n (%) | Source Paper                                                      | Correct<br><br>Respondents<br>from previous<br>studies<br><br>% | Between papers test<br><br>of frequency of<br>correct responses             |
|-----------------------------------------------------------------------------------------------------------|--------------------|--------------------------------------------------------------------|-------------------------------------------------------------------|-----------------------------------------------------------------|-----------------------------------------------------------------------------|
| 10. A gene is a cell<br><br>(physiology/biology)                                                          | Not<br><br>Correct | 403 (56%)                                                          | Jallinoja and<br><br>Aro (1999)                                   | 620 (51%)                                                       | $\chi^2(1, N = 1936) = 4.51, p = .03$                                       |
| 11. A gene is a part of a<br>chromosome<br><br>(physiology/biology)                                       | Correct            | 533 (74%)                                                          | Jallinoja and<br><br>Aro (1999);<br><br>Molster et al.,<br>(2009) | 547 (45%)<br><br><br>525 (52%)                                  | $\chi^2(1, N = 1936) = 154.7^{**}$<br><br>$\chi^2(1, N = 1729) = 85.6^{**}$ |
| 12. Genes are bigger than<br>chromosomes<br><br>(physiology/biology)                                      | Not<br><br>Correct | 518 (72%)                                                          | Jallinoja and<br><br>Aro (1999)                                   | 499 (41%)                                                       | $\chi^2(1, N = 1936) = 173.3^{**}$                                          |
| 13. It has been estimated that a<br>person has about 20,000-<br>25,000 genes*<br><br>(physiology/biology) | Correct            | 475 (66%)                                                          | Jallinoja and<br><br>Aro (1999)                                   | 219 (18%)                                                       | $\chi^2(1, N = 1936) = 452.4^{**}$                                          |
| 14. Your blood can uniquely<br>identify you because it<br>contains your DNA                               | Correct            | 634 (88%)                                                          | Molster et al.<br><br>(2009)                                      | 918 (91%)                                                       | $\chi^2(1, N = 1729) = 3.91, p = .048$                                      |



| Question<br>(subcategory or genetic knowledge)                                                             | Answer      | Correct respondents in the current study<br>n (%) | Source Paper                                 | Correct Respondents from previous studies<br>% | Between papers test of frequency of correct responses                    |
|------------------------------------------------------------------------------------------------------------|-------------|---------------------------------------------------|----------------------------------------------|------------------------------------------------|--------------------------------------------------------------------------|
| (physiology/biology)                                                                                       |             |                                                   |                                              |                                                |                                                                          |
| 15. If close relatives have diabetes/heart disease, you are more likely to develop these (disease, family) | Correct     | 605 (84%)                                         | Molster et al. (2009)                        | 878 (87%)                                      | $\chi^2$ (1, N = 1729) = 3.08, p = .079                                  |
| 16. If a person is the carrier of a disease gene it means that they have the disease (disease)             | Not Correct | 641 (89%)                                         | Molster et al. (2009); Ashida et al. (2011)* | 807 (80%)<br><br>562 (76%)                     | $\chi^2$ (1, N = 1729) = 25.27**<br><br>$\chi^2$ (1, N = 1691) = 195.4** |
| 17. Having increased genetic risk means you get that disease regardless of what you do (family)            | Not Correct | 576 (80%)                                         | Molster et al. (2009)                        | 757 (75%)                                      | $\chi^2$ (1, N = 1729) = 5.89, p = .015                                  |
| 18. Living a healthy lifestyle will not make any difference if you have an                                 | Not Correct | 475 (66%)                                         | Molster et al. (2009);                       | 686 (68%)<br><br>208 (26%)                     | $\chi^2$ (1, N = 1729) = .77, p = .38                                    |

| Question<br><br>(subcategory or genetic knowledge)                                                                              | Answer             | Correct<br><br>respondents in<br>the current<br>study<br><br>n (%) | Source Paper                 | Correct<br><br>Respondents<br>from previous<br>studies<br><br>% | Between papers test<br><br>of frequency of<br>correct responses |
|---------------------------------------------------------------------------------------------------------------------------------|--------------------|--------------------------------------------------------------------|------------------------------|-----------------------------------------------------------------|-----------------------------------------------------------------|
| increased genetic risk for a disease<br><br>(disease)                                                                           |                    |                                                                    | Ashida et al.<br><br>(2011)* |                                                                 | $\chi^2$ (1, N = 1691) = 340.8**                                |
| 19. Your blood contains a full copy of all your genes<br><br>(physiology/biology)                                               | Correct            | 518 (72%)                                                          | Molster et al.<br><br>(2009) | 686 (68%)                                                       | $\chi^2$ (1, N = 1729) = 3.11, p = .078                         |
| 20. It is the father's chromosomes that decide if a baby is a boy or a girl<br><br>(family)                                     | Correct            | 511 (71%)                                                          | Molster et al.<br><br>(2009) | 626 (62%)                                                       | $\chi^2$ (1, N = 1729) = 14.9**                                 |
| 21. Half your genes come from your mother and half from your father<br><br>(family)                                             | Correct            | 554 (77%)                                                          | Molster et al.<br><br>(2009) | 555 (55%)                                                       | $\chi^2$ (1, N = 1729) = 87.9**                                 |
| 22. Once a genetic marker for a health condition is found in a person, the condition can be prevented or cured<br><br>(disease) | Not<br><br>Correct | 403 (56%)                                                          | Ashida et al.<br><br>(2011)  | 200 (29%)                                                       | $\chi^2$ (1, N = 1691) = 225.5**                                |

| Question<br><br>(subcategory or genetic knowledge)                                                                                          | Answer             | Correct<br><br>respondents in<br>the current<br>study<br><br>n (%) | Source Paper                | Correct<br><br>Respondents<br>from previous<br>studies<br><br>% | Between papers test<br><br>of frequency of<br>correct responses |
|---------------------------------------------------------------------------------------------------------------------------------------------|--------------------|--------------------------------------------------------------------|-----------------------------|-----------------------------------------------------------------|-----------------------------------------------------------------|
| 23. Only mothers can pass on genetic conditions (family)                                                                                    | Not<br><br>Correct | 677 (94%)                                                          | Ashida et al.<br><br>(2011) | 814 (88%)                                                       | $\chi^2$ (1, N = 1691) = 41.2**                                 |
| 24. People who have a genetic marker for a disease are unhealthy (disease)                                                                  | Not<br><br>Correct | 677 (94%)                                                          | Ashida et al.<br><br>(2011) | 730 (86%)                                                       | $\chi^2$ (1, N = 1691) = 105.1**                                |
| 25. On average, a person has half their genes in common with their siblings (family)                                                        | Correct            | 533 (74%)                                                          | Christensen et al. (2010)   | 960 (80%)                                                       | $\chi^2$ (1, N = 1920) = 9.28, p =.002                          |
| 26. Our genes tell us which race we belong to (social group)                                                                                | Not<br><br>Correct | 137 (19%)                                                          | Christensen et al. (2010)   | 300 (25%)                                                       | $\chi^2$ (1, N = 1920) = 9.13, p =.003                          |
| 27. Two people from the same race will always be more genetically similar to each other than two people from different races (social group) | Not<br><br>Correct | 259 (36%)                                                          | Christensen et al. (2010)   | 516 (43%)                                                       | $\chi^2$ (1, N = 1920) = 9.23, p =.002                          |

| Question<br>(subcategory or genetic knowledge)                                                                               | Answer         | Correct<br>respondents in<br>the current<br>study<br>n (%) | Source Paper              | Correct<br>Respondents<br>from previous<br>studies<br>% | Between papers test<br>of frequency of<br>correct responses |
|------------------------------------------------------------------------------------------------------------------------------|----------------|------------------------------------------------------------|---------------------------|---------------------------------------------------------|-------------------------------------------------------------|
| 28. Two women will always be more genetically similar to one another than a man and a woman (social group)                   | Not<br>Correct | 518 (72%)                                                  | Christensen et al. (2010) | 528 (44%)                                               | $\chi^2$ (1, N = 1920) = 141.7**                            |
| 29. A mother and daughter who look alike have more genes in common than a mother and daughter who do not look alike (family) | Not<br>Correct | 482 (67%)                                                  | Christensen et al. (2010) | 444 (37%)                                               | $\chi^2$ (1, N = 1920) = 161.6**                            |
| 30. Single genes directly control specific human behaviours (behaviour)                                                      | Not<br>Correct | 439 (61%)                                                  | Christensen et al. (2010) | 288 (24%)                                               | $\chi^2$ (1, N = 1920) = 261.5**                            |

Note. \*Indicates the wording of the item was modified from the source paper. \*\*Significant at  $p < .001$ , p-values are otherwise stated within the table.

## References

- Ashida S, Goodman M, Pandya C, Koehly LM, Lachance C, Stafford J, et al.: Age differences in genetic knowledge, health literacy and causal beliefs for health conditions. *Public Health Genomics* 2011;14:307–316.
- Christensen KD, Jayaratne TE, Roberts JS, Kardia SLR, Petty EM: Understandings of basic genetics in the united states: results from a national survey of black and white men and women. *Public Health Genomics* 2010;13:467–476.
- Jallinoja P, Aro AR: Knowledge about genes and heredity among Finns. *New Genet Soc* 1999;18:101–110.
- Molster C, Charles T, Samanek A, O’Leary P: Australian study on public knowledge of human genetics and health. *Public Health Genomics* 2009;12:84–91.
